# Supplementary material
Source: HighWire-hosted journal article supplement (https://www.cmajopen.ca/content/suppl/2019/01/28/7.1.E47)
Supplement: 2018-0181-original-submission.pdf [file 2018-0181-original-submission.pdf]

1  
2  
3 **Title:** Patient and non-patient factors associated with short internal medicine hospital  
4 admissions  
5

6 **Authors:**  
7

8 Amol A Verma MD, MPhil Li Ka Shing Knowledge Institute, St. Michael's Hospital,  
9 Department of Medicine, University of Toronto.  
10

11 Yishan Guo, MSc, Li Ka Shing Knowledge institute, St. Michael's Hospital, Toronto.  
12

13 Janice L Kwan, MD, MPH, Department of Medicine, Mount Sinai Hospital, Department  
14 of Medicine, University of Toronto.  
15

16 Lauren Lapointe-Shaw, MD, Department of Medicine, University of Toronto  
17

18 Shail Rawal MD, MPH, Division of General Internal Medicine, University Health  
19 Network, Department of Medicine, University of Toronto.  
20

21 Terence Tang, MD, Trillium Health Partners, Department of Medicine, University of  
22 Toronto.  
23

24 Adina Weirnerman, MD, MHSc, Sunnybrook Health Sciences Centre, Department of  
25 Medicine, University of Toronto.  
26

27 Fahad Razak MD MSc FRCPC, Li Ka Shing Knowledge Institute, St Michael's Hospital,  
28 Institute of Health Policy, Management and Evaluation and Department of Medicine,  
29 University of Toronto, Harvard Center for Population and Development Studies  
30  
31

32 **Word Count:** 2,533  
33

34 **Corresponding Author:** Amol A. Verma, Li Ka Shing Knowledge Institute, St. Michael's  
35 Hospital, and the Department of Medicine, University of Toronto; Address: Li Ka Shing  
36 Knowledge Institute, St. Michael's Hospital, Room 714-3, 2 Queen St. East, Toronto,  
37 Ontario, M5C 3G7, Canada. Email: amol.verma@mail.utoronto.ca  
38  
39

40 **Funding:** GEMINI was supported by grants from Green Shield Canada Foundation and  
41 the University of Toronto Division of General Internal Medicine. This study was  
42 supported by the St. Michael's Hospital Medical Services Association Innovation Funds  
43 (#SMH-17-007). AAV is supported by funding from the University of Toronto  
44 Department of Medicine Eliot Phillipson Clinician-Scientist Training Program.  
45

46 **Contributorship Statement:** AAV and FR conceived and designed the study and led  
47 data collection. AAV drafted the manuscript. YG conducted statistical analysis and  
48 contributed to study design. JLK, LLS, SR, TT, and AW led data collection from their  
49 individual study sites. All authors critically revised the manuscript for important  
50 intellectual content.  
51  
52  
53  
54  
55  
56  
57  
58  
59  
60

## Abstract

**Background:** Short hospital admissions may represent targets for interventions to avert unnecessary admissions or expedite inpatient care. We examined physician and situational factors associated with short internal medicine hospital admissions.

**Methods:** This was a multicentre cross-sectional study between April 1, 2012 and March 31, 2015 at 5 teaching hospitals in Toronto, Ontario. We included all internal medicine admissions through the emergency department (n=56,055). We examined physician (years of practice, sex), situational (time and day of admission, physician workload), and patient (age, sex, comorbidity level, ambulance transport to hospital, recent admission, and the laboratory-based acute physiology score) predictors of short admission to hospital, which was defined as patients discharged home alive in two possible time windows: less than 24 or less than 72 hours.

**Results:** Patients discharged in less than 24 hours and less than 72 hours accounted for 7.6% and 31.6% of admissions, respectively. After controlling for patient factors, patients of women physicians were less likely to have admissions lasting less than 24 hours (adjusted Odds Ratio 0.81, 95%CI:0.75-0.88) or 72 hours (aOR 0.82, 95%CI:0.79-0.86). Patients admitted at night or on a weekday were significantly more likely to have admissions lasting less than 24 hours (night: aOR 2.65, 95%CI:2.36-2.98, weekday: aOR 1.24 95%CI: 1.15-1.34) or less than 72 hours (night: aOR 1.26, 95%CI: 1.19-1.33, weekday: aOR 1.06 95%CI: 1.01-1.10).

**Interpretation:** Short internal medicine admissions are common and associated with physician and situational factors in addition to patient factors, suggesting some admissions could be avoided or made more efficient.

## Introduction

Given the high costs of hospital care, there is significant interest in averting unnecessary hospital admissions and reducing length-of-stay. Interventions designed to either avoid(1) or reduce the length of hospital admissions have included hospital-at-home(2), short stay or observation units(3–7), and rapid access clinics.(8) Patients with short hospital length-of-stay may be candidates for these models of expedited and streamlined care.

Patient age, illness severity, level of comorbidity, and functional status have all been associated with longer hospital length-of-stay.(9–15) However, less is known about the situational or physician factors and resource use associated with short medical admissions. This information may highlight opportunities to improve care. To inform the design of interventions that target patients with potentially avoidable or brief hospital admissions, we examined the patient, physician, and situational characteristics associated with short hospital admissions to internal medicine wards. In addition, we described the use of hospital resources by patients with short admissions.

## Methods

### Design, Setting, and Participants

This was a multicentre cross-sectional study involving 5 academic hospitals in Toronto, Ontario, who were participating in the General Medicine Inpatient Initiative (GEMINI).(16) All Ontario residents have access to publicly funded essential hospital services. The participating hospitals cater to a diverse urban population, and range in size from 433 to 1,325 acute inpatient beds. General internal medicine (GIM) patients

1  
2  
3 accounted for 39% of emergency department (ED) admissions to hospital and 24% of  
4 hospital bed-days.(16)  
5  
6  
7

8 We included all patients admitted to the GIM service through the ED and  
9 discharged between April 1, 2012 and March 31, 2015. The GIM services operate on a  
10 hospitalist model, are staffed predominantly by internists, and include clinical teaching  
11 units, non-teaching hospitalist services, and one family medicine inpatient unit.(16) We  
12 excluded patients who were missing provincial health insurance numbers (n=646,  
13 1.1%), because these were needed to ascertain previous healthcare usage. We also  
14 excluded patients who were missing data on the sex of the most responsible physician  
15 (n=1,524, 2.6%) or ambulance transport to hospital (n=3, <0.01%).  
16  
17  
18  
19  
20  
21  
22  
23  
24  
25  
26

#### 27 Data Sources

28  
29  
30 Data for GEMINI were collected from administrative sources and hospital  
31 information systems and linked at the individual patient level, as has previously been  
32 described.(16) Patient demographics and clinical characteristics were collected from  
33 hospital administrative databases as reported to the Canadian Institute for Health  
34 Information (CIHI).(17) Laboratory and radiology results, blood transfusions, and in-  
35 hospital medications were extracted from hospital information systems. Laboratory data  
36 were cleaned by removing non-numeric values.  
37  
38  
39  
40  
41  
42  
43  
44  
45  
46

47 Each hospital admission was attributed to a single 'most responsible physician' as  
48 per the CIHI Discharge Abstract Database, defined as the physician who is "responsible  
49 for the care and treatment of the patient for the majority of the visit to the health care  
50  
51  
52  
53  
54  
55  
56  
57  
58  
59  
60

1  
2  
3 facility”.(17) Physician characteristics were collected from the College of Physicians and  
4  
5 Surgeons of Ontario publicly-available physician information database.(18)  
6  
7

## 8 Outcomes and Measures 9

10  
11 The main outcome was discharge home alive after a short hospital admission.  
12  
13 There is no universally-accepted definition of what constitutes a short hospital  
14  
15 admission. Short stay units are designed to monitor patients for the first 24(3) to 72  
16  
17 hours.(9,12) Therefore, we conducted two parallel analyses to compare longer  
18  
19 hospitalizations to those lasting a) less than 24 hours, and b) less than 72 hours.  
20  
21 Patients who died in hospital, left hospital against medical advice, or were transferred to  
22  
23 another acute inpatient, rehabilitation, or palliative care facility were categorized along  
24  
25 with longer admissions.  
26  
27  
28

29  
30 We examined patient, physician, and situational factors associated with short  
31  
32 admission. Patient characteristics included: age, sex, Charlson comorbidity score,(19)  
33  
34 the Laboratory-based Acute Physiology Score (LAPS, a measure of illness  
35  
36 severity),(20,21) ambulance transport, admission to a short stay unit (which was  
37  
38 available at two participating hospitals), admission to GIM at a study site in the 30  
39  
40 previous days, and fiscal year of admission. Physician characteristics included years  
41  
42 since medical school graduation and sex. Situational factors included the day of  
43  
44 admission categorized as weekend or weekday, time of admission categorized as ‘day’  
45  
46 (8:00 to 16:59:59), ‘evening’ (17:00 to 24:00), or ‘night’ (00:00:01 to 7:59:59), and the  
47  
48 volume of admissions to GIM in the previous 12 hours. This 12-hour time window was  
49  
50 pre-specified as a measure of the workload of the admitting GIM physicians in the ED.  
51  
52  
53  
54  
55  
56  
57  
58  
59  
60

1  
2  
3 We categorized each admission into a clinical condition based on their principal  
4 discharge diagnosis using the Clinical Classifications Software (CCS) tool,(22) which  
5 aggregates ICD-10 diagnoses into 285 mutually exclusive clinically-relevant categories.  
6  
7 We report the number of admissions in which at least one of the following was used:  
8 order for intravenous medication, radiograph, computed tomography (CT) scan,  
9  
10 ultrasound scan, magnetic resonance imaging (MRI) scan, red blood cell transfusion,  
11  
12 endoscopy procedure, or bronchoscopy procedure. We also report the mean time spent  
13  
14 in the ED and the proportion of patients admitted to the intensive care unit.  
15  
16  
17  
18  
19  
20  
21

## 22 Statistical Analysis

23  
24  
25 We first compared patient characteristics among those discharged home alive in  
26 less than 24 hours, 24-72 hours, and all other admissions using chi-square and  
27  
28 Kruskal-Wallis tests for categorical and continuous variables, respectively. Second, we  
29  
30 performed two multilevel logistic regression analyses, accounting for the nested  
31  
32 structure of our data: patients nested within physicians nested within hospitals. In the  
33  
34 first analysis, short admissions were defined as having a length-of-stay less than 24  
35  
36 hours and compared with all others. In the second analysis, short admissions were  
37  
38 defined as having a hospital length-of-stay less than 72 hours. To explore whether  
39  
40 patient characteristics might contribute to differences in short admissions related to  
41  
42 situational factors, we compared patient characteristics among short admissions at  
43  
44 different times of day or on the weekend using chi-square and Kruskal-Wallis tests.  
45  
46  
47 Third, we report the 15 most common discharge diagnoses for patients discharged  
48  
49 home alive in less than 24 hours, 24 to 72 hours, and all other admissions. Finally, we  
50  
51  
52  
53  
54  
55  
56  
57  
58  
59  
60

1  
2  
3 report the hospital resources used by patients with admissions of different durations. All  
4  
5 analyses were performed using 'R' version 3.3.2.  
6  
7

## 8 **Results**

9

10  
11 The final study sample included 56,055 admissions. Overall, 10,360 admissions  
12  
13 (18.5%) resulted in transfer to another inpatient, rehabilitation, or palliative care facility,  
14  
15 3,264 admissions (5.8%) ended with death in hospital, and 1,253 admissions (2.2%)  
16  
17 ended with patients leaving against medical advice. Patients were discharged home  
18  
19 alive within 24 hours in 4,245 admissions (7.6%) and between 24 to 72 hours in 13,442  
20  
21 admissions (24.0%). The overall median length of stay was 4.4 days (interquartile range  
22  
23 2.25-8.54).  
24  
25  
26  
27

### 28 Patient Characteristics Associated with Short Admission

29

30  
31 Patients with shorter admissions were significantly younger, had lower  
32  
33 comorbidity, were less likely to arrive by ambulance, had a lower average LAPS, and  
34  
35 were less likely to have a recent prior admission (Table 1). In multi-level regression  
36  
37 models, increasing age, higher Charlson comorbidity index, transport via ambulance,  
38  
39 recent admission, and higher LAPS were all associated with a significantly lower  
40  
41 likelihood of short admission, when defined as either less than 24 hours or less than 72  
42  
43 hours (Table 2).  
44  
45  
46  
47

### 48 Physician Characteristics Associated with Short Admission

49

50  
51 The number of years since physician graduation was not significantly associated  
52  
53 with the likelihood of short admission under either definition (Table 2). Patients of  
54  
55 women physicians were significantly less likely to have short admissions lasting either  
56  
57  
58  
59  
60

1  
2  
3 less than 24 hours (adjusted odds ratio 0.80, 95% CI 0.74-0.86) or less than 72 hours  
4  
5 (aOR 0.82, 95%CI 0.79-0.86).  
6  
7

### 8 Situational Factors Associated with Short Admission 9

10  
11 Short admissions lasting less than either 24 or 72 hours, were more likely for  
12 patients admitted in the evening or night (Table 2). Short admissions were significantly  
13 more likely for patients admitted on a weekday, although this effect was stronger for  
14 admissions lasting less than 24 hours (aOR 1.26, 95% CI 1.17-1.36) than for  
15 admissions lasting less than 72 hours (aOR 1.05, 95% CI: 1.01-1.10). There was no  
16 significant association between short admissions and the number of patients admitted to  
17 GIM in the previous 12 hours (Table 2).  
18  
19  
20  
21  
22  
23  
24  
25  
26  
27

28 Compared to patients with short admissions who were admitted in the day-time,  
29 patients admitted in the evening or at night were older ( $p < 0.001$ ) but were not  
30 consistently different in comorbidity level or illness severity (Tables S1 and S2). Patients  
31 with admissions lasting less than 72 hours who were admitted on the weekend had  
32 more severe illness than those admitted on weekdays, indicated by greater rates of  
33 ambulance transport (43.4% vs 40.0%,  $p < 0.001$ ) and greater LAPS (mean 16.04 vs  
34 15.35,  $p < 0.004$ ), but these differences were not seen among admissions lasting less  
35 than 24 hours (Tables S3 and S4).  
36  
37  
38  
39  
40  
41  
42  
43  
44  
45  
46

### 47 Common Discharge Diagnoses 48

49  
50 The most common discharge diagnoses differed somewhat among admissions of  
51 different durations (Table 3). Non-specific chest pain, syncope, adverse effects of  
52 medical drugs, and alcohol-related disorders were among the 15 most common causes  
53  
54  
55  
56  
57  
58  
59  
60



1  
2  
3 of admissions lasting less than 24 or less than 72 hours but not longer admissions.  
4  
5 Epilepsy and vertigo were among the most common causes of admissions lasting less  
6  
7 than 24 hours. No single diagnosis represented more than 4.1% of admissions lasting  
8  
9 less than 24 hours, 6.5% of admissions lasting between 24 and 72 hours, or 5.7% of all  
10  
11 other admissions.  
12  
13

#### 14 15 Resource Use in Short Admissions 16

17  
18 Patients with hospital admissions lasting less than 24 hours and 24-72 hours spent  
19  
20 on average 14.8 hours (SD 6.6) and 15.7 hours (SD 9.0) in the ED, respectively (Table  
21  
22 4). Among patients with admissions lasting less than 24 hours and 24-72 hours,  
23  
24 intravenous medications were ordered for 65.7% and 79.8%, respectively, and CT  
25  
26 scans were performed for 36.8% and 39.1%, respectively. Among patients with  
27  
28 admission lasting less than 72 hours, 1925 (10.9%) did not receive any intravenous  
29  
30 medication, CT scans, magnetic resonance imaging, ultrasound, endoscopy,  
31  
32 bronchoscopy or intensive care.  
33  
34  
35

#### 36 37 Interpretation 38

39  
40 This large multicentre study found that short admissions to GIM were common and  
41  
42 were associated with both patient and non-patient factors. We found that 31.6% of  
43  
44 admissions in GIM lasted less than 72 hours and 7.6% lasted less than 24 hours. After  
45  
46 controlling for other factors, short admissions were more common for patients admitted  
47  
48 overnight or on weekdays and for patients cared for by men physicians. We also  
49  
50 identified discharge diagnoses that were more common among short admissions and  
51  
52 described their hospital resource usage. Our finding that physician and situational  
53  
54  
55  
56  
57  
58  
59  
60

1  
2  
3 factors are associated with short admissions highlights opportunities to further  
4  
5 streamline care.  
6  
7

8  
9 Several interventions have been directed toward patients with short length-of-  
10 stay(1) such as short stay or observation units,(3–7) hospital-at-home,(2) or rapid-  
11 access clinics.(8) Our findings offer insights for the design and delivery of these  
12 interventions for medical patients. First, we identified the most prevalent conditions  
13 affecting patients with short length of stay in GIM. It may be difficult to organize  
14 programs around individual diseases, because no single condition comprised more than  
15 6.5% of short admissions. However, certain conditions were more common among short  
16 admissions: chest pain, syncope, alcohol-related disorders, and adverse drug effects.  
17  
18 Second, intravenous medication and radiologic and endoscopic investigations were  
19 important in the care of short stay patients. Providing expedited access to these  
20 treatments and investigations may be an important component of short stay  
21 interventions. Third, patients were more likely to have a short stay when they were  
22 admitted in the evening or at night. Thus, accessing short stay interventions should  
23 ideally be possible outside of typical working hours.  
24  
25  
26  
27  
28  
29  
30  
31  
32  
33  
34  
35  
36  
37  
38  
39  
40

41 Short admissions may represent avoidable hospitalizations or efficient  
42 hospitalizations that would otherwise have been longer. This may explain why short  
43 admissions were more common in the evening and overnight but less common on the  
44 weekend. After-hours admissions at participating hospitals are performed by in-house  
45 residents, who typically review cases with staff physicians before discharging patients.  
46 Residents may prefer not to “disturb” their staff physician and elect to review the case  
47 the next morning rather than discharge a patient overnight. It may also be difficult to  
48  
49  
50  
51  
52  
53  
54  
55  
56  
57  
58  
59  
60

1  
2  
3 coordinate aspects of a patient's discharge overnight, resulting in a brief but potentially  
4 avoidable admission. On the weekend, it may be difficult to coordinate patient  
5 discharges or patients may experience delays in receiving tests or procedures.(23,24)  
6  
7 Further, covering physicians on the weekend may be less likely to discharge a patient  
8 with whom they are less familiar. Short admissions may be less likely on weekends  
9  
10 because patients who would otherwise be discharged remain in hospital. Whereas,  
11 short admissions may be more likely on weeknights as patients who would otherwise be  
12 discharged home are admitted overnight in the ED. Short admissions in the evening, at  
13 night, or on weekends, did not occur for patients with lower comorbidity or less severe  
14 illness as might be expected if admissions were primarily due to logistical factors.  
15  
16 Nevertheless, our findings are consistent with a body of literature suggesting differential  
17 access to care and patient outcomes at night and on weekends compared with  
18 weekdays(23–26) and we identify an interesting difference between nights and  
19 weekends.  
20  
21  
22  
23  
24  
25  
26  
27  
28  
29  
30  
31  
32  
33  
34  
35

36 Patients of women physicians were less likely to have short admissions even after  
37 controlling for years of physician practice and numerous patient factors such as age,  
38 comorbidities, and illness severity. The validity of the comparison between men and  
39 women physicians is strengthened in this cohort because all patients were admitted  
40 non-electively through the ED and thus physician assignment occurred through a  
41 pseudo-random process, mitigating selection effects similar to other observational  
42 studies.(27) Although patient outcomes may differ between hospitalists and non-  
43 hospitalists,(28) all physicians in our sample were hospitalists and almost all physicians  
44 were internists. Thus, sex-related differences were not likely to be due to differences in  
45  
46  
47  
48  
49  
50  
51  
52  
53  
54  
55  
56  
57  
58  
59  
60

1  
2  
3 specialty or patient case mix. Recent analyses suggest that patients of women  
4 physicians may have better outcomes than men physicians.(27) In the absence of  
5 analyses regarding mortality and readmissions rates, we cannot comment on the  
6 possible relationship between shorter length of stay and quality of care. Further  
7 research should seek to understand whether women physicians are more likely to  
8 discharge patients directly from the ED without hospital admission or less likely to  
9 discharge patients quickly from hospital, and whether such decisions contribute to  
10 differences in patient outcomes.  
11  
12  
13  
14  
15  
16  
17  
18  
19  
20  
21

22 There are several important limitations to our study. First, we only included GIM  
23 patients, not all medical admissions. We chose to focus on GIM because it is a large  
24 inpatient service in our hospitals and our objective was to understand models of care.  
25 Second, we included five teaching hospitals, and thus our results may not be  
26 generalizable to non-teaching sites where models of care and staffing differ. Although  
27 our study was conducted in a Canadian context, the median length-of-stay (4.4 days)  
28 was similar to studies in Europe and the USA,(29,30) supporting the generalizability of  
29 our findings. Third, we were unable to collect data about patient living situation,  
30 caregiver support, functional status, or socioeconomic status, which likely have  
31 important effects on hospital length-of-stay. Fourth, care in GIM is often delivered in  
32 teams and multiple physicians may care for individual patients. Misattribution may occur  
33 when assigning patients to a single most responsible physician. However, error  
34 resulting from this misclassification would be non-differential between physicians and  
35 unlikely to affect our results. Moreover, handovers are less likely for patients with  
36  
37  
38  
39  
40  
41  
42  
43  
44  
45  
46  
47  
48  
49  
50  
51  
52  
53  
54  
55  
56  
57  
58  
59  
60

1  
2  
3 shorter admissions. Finally, we did not collect data on patients who were seen by the  
4  
5 GIM service in the ED but not admitted to hospital.  
6  
7

8 In conclusion, short hospital admissions to GIM are common. They occur more  
9  
10 frequently when patients are admitted in the evening or overnight and when physicians  
11  
12 are men. Interventions to streamline care for these patients and avert hospital  
13  
14 admissions may be more effective if they are accessible outside of typical working hours  
15  
16 and provide access to intravenous medication and radiological and endoscopic  
17  
18 interventions.  
19  
20  
21  
22  
23  
24  
25  
26  
27  
28  
29  
30  
31  
32  
33  
34  
35  
36  
37  
38  
39  
40  
41  
42  
43  
44  
45  
46  
47  
48  
49  
50  
51  
52  
53  
54  
55  
56  
57  
58  
59  
60

Confidential

1  
2  
3  
4  
5  
6  
7  
8  
9  
10  
11  
12  
13  
14  
15  
16  
17  
18  
19  
20  
21  
22  
23  
24  
25  
26  
27  
28  
29  
30  
31  
32  
33  
34  
35  
36  
37  
38  
39  
40  
41  
42  
43  
44  
45  
46  
47  
48  
49  
50  
51  
52  
53  
54  
55  
56  
57  
58  
59  
60

Table 1. Patient characteristics associated with duration of admission to GIM

Table 2. Multi-level regression models of patient, physician, and situational characteristics associated with short admissions to GIM.

Table 3. Fifteen most common discharge diagnoses among admissions to GIM with different durations.

Table 4. Resource use among GIM admissions of varying duration.

Confidential

## References

1. Conley J, O'Brien CW, Leff BA, Bolen S, Zulman D. Alternative strategies to inpatient hospitalization for acute medical conditions: A systematic review. *JAMA Intern Med.* 2016;176(11):1693–702.
2. Jeppesen E, Brurberg KG, Vist GE, Wedzicha JA, Wright JJ, Greenstone M, et al. Hospital at home for acute exacerbations of chronic obstructive pulmonary disease. In: Jeppesen E, editor. *Cochrane Database of Systematic Reviews* [Internet]. Chichester, UK: John Wiley & Sons, Ltd; 2012. p. CD003573.
3. Galipeau J, Pussegoda K, Stevens A, Brehaut JC, Curran J, Forster AJ, et al. Effectiveness and Safety of Short-stay Units in the Emergency Department: A Systematic Review. *Acad Emerg Med.* 2015;22(8):893–907.
4. Ross MA, Naylor S, Compton S, Gibb KA, Wilson AG. Maximizing use of the emergency department observation unit: a novel hybrid design. *Ann Emerg Med.* 2001 Mar;37(3):267–74.
5. Mace SE, Graff L, Mikhail M, Ross M. A national survey of observation units in the United States. *Am J Emerg Med* [Internet]. 2003;21(7):529–33.
6. Blecker S, Gavin NP, Park H, Ladapo JA, Katz SD. Observation Units as Substitutes for Hospitalization or Home Discharge. *Ann Emerg Med* [Internet]. 2016;67(6):706–713.e2.
7. Baugh CW, Venkatesh AK, Hilton JA, Samuel PA, Schuur JD, Bohan JS. Making greater use of dedicated hospital observation units for many short-stay patients could save \$3.1 billion a year. *Health Aff.* 2012;31(10):2314–23.
8. O'Brien E, Priglinger ML, Bertmar C, Day S, Borsodi C, Herkes G, et al. Rapid access point of care clinic for transient ischemic attacks and minor strokes. *J Clin Neurosci* [Internet]. 2015;23:106–10.
9. Lucas BP, Kumapley R, Mba B, Nisar I, Lee K, Ofori-Ntow S, et al. A hospitalist-run short-stay unit: Features that predict length-of-stay and eventual admission to traditional inpatient services. *J Hosp Med.* 2009;4(5):276–84.
10. Caterino JM, Hoover EM, Moseley MG. Effect of advanced age and vital signs on admission from an ED observation unit. *Am J Emerg Med* [Internet]. 2013;31(1):1–7.
11. Basic D, Khoo A. Admission variables predicting short lengths of stay of acutely unwell older patients: Relevance to emergency and medical short-stay units. *Aust Heal Rev.* 2009;33(3):502–12.
12. Yong TY, Li JYZ, Roberts S, Hakendorf P, Ben-Tovim DI, Thompson CH. The selection of acute medical admissions for a short-stay unit. *Intern Emerg Med.* 2011;6(4):321–7.
13. Powter L, Beale A, Probert B, Dhanda A. Development and validation of a tool to select patients for admission to medical short stay units. *Clin Med J R Coll*

- 1  
2  
3 Physicians London. 2014;14(4):371–5.  
4
- 5 14. Dinh MM, Bein KJ, Byrne CM, Gabbe B, Ivers R. Deriving a prediction rule for  
6 short stay admission in trauma patients admitted at a major trauma centre in  
7 Australia. *Emerg Med J [Internet]*. 2014;31(4):263–7.  
8
- 9 15. Formiga F, Chivite D, Manito N, Mestre AR, Llopis F, Pujol R. Admission  
10 characteristics predicting longer length of stay among elderly patients hospitalized  
11 for decompensated heart failure. *Eur J Intern Med*. 2008;19(3):198–202.  
12
- 13 16. Verma AA, Guo Y, Kwan JL, Lapointe-Shaw L, Rawal S, Tang T, et al. Patient  
14 characteristics, resource use and outcomes associated with general internal  
15 medicine hospital care: the General Medicine Inpatient Initiative (GEMINI)  
16 retrospective cohort study. *C Open [Internet]*. 2017 Dec 11;5(4):E842–9.  
17
- 18 17. Canadian Institute for Health Information. DAD Abstracting Manual, 2015-2016  
19 Edition. Ottawa, ON; 2015.  
20
- 21 18. The College of Physicians and Surgeons of Ontario. Public Information and  
22 Services [Internet]. 2017 [cited 2017 Dec 12].  
23
- 24 19. Quan H, Li B, Couris CM, Fushimi K, Graham P, Hider P, et al. Updating and  
25 validating the charlson comorbidity index and score for risk adjustment in hospital  
26 discharge abstracts using data from 6 countries. *Am J Epidemiol*.  
27 2011;173(6):676–82.  
28
- 29 20. Escobar GJ, Greene JD, Scheirer P, Gardner MN, Draper D, Kipnis P. Risk-  
30 adjusting hospital inpatient mortality using automated inpatient, outpatient, and  
31 laboratory databases. *Med Care [Internet]*. 2008;46(3):232–9.  
32
- 33 21. van Walraven C, Escobar GJ, Greene JD, Forster AJ. The Kaiser Permanente  
34 inpatient risk adjustment methodology was valid in an external patient population.  
35 *J Clin Epidemiol [Internet]*. 2010 Jul;63(7):798–803.  
36
- 37 22. (HCUP) HC and UP. Beta Clinical Classifications Software (CCS) for ICD-10-  
38 CM/PCS [Internet]. Agency for Healthcare Research and Quality. 2017 [cited  
39 2017 Oct 27].  
40
- 41 23. Bell CM, Redelmeier DA. Waiting for urgent procedures on the weekend among  
42 emergently hospitalized patients. *Am J Med*. 2004 Aug;117(3):175–81.  
43
- 44 24. Magid DJ, Wang Y, Herrin J, McNamara RL, Bradley EH, Curtis JP, et al.  
45 Relationship between time of day, day of week, timeliness of reperfusion, and in-  
46 hospital mortality for patients with acute ST-segment elevation myocardial  
47 infarction. *JAMA*. 2005 Aug;294(7):803–12.  
48
- 49 25. Concha OP, Gallego B, Hillman K, Delaney GP, Coiera E. Do variations in  
50 hospital mortality patterns after weekend admission reflect reduced quality of care  
51 or different patient cohorts? A population-based study. *BMJ Qual Saf*. 2014  
52 Mar;23(3):215–22.  
53
- 54 26. Kostis WJ, Demissie K, Marcella SW, Shao Y-H, Wilson AC, Moreyra AE.  
55  
56  
57  
58  
59  
60



- 1  
2  
3 Weekend versus weekday admission and mortality from myocardial infarction. *N Engl J Med*. 2007 Mar;356(11):1099–109.
- 4  
5
- 6 27. Tsugawa Y, Jena AB, Figueroa JF, Orav EJ, Blumenthal DM, Jha AK.  
7 Comparison of Hospital Mortality and Readmission Rates for Medicare Patients  
8 Treated by Male vs Female Physicians. *JAMA Intern Med* [Internet].  
9 2016;177(2):206–13.
- 10  
11 28. Rifkin WD, Holmboe E, Scherer H, Sierra H. Comparison of hospitalists and  
12 nonhospitalists in inpatient length of stay adjusting for patient and physician  
13 characteristics. *J Gen Intern Med*. 2004;19(11):1127–32.
- 14  
15 29. Ong M, Bostrom A, Vidyarthi A, McCulloch C, Auerbach A. House staff team  
16 workload and organization effects on patient outcomes in an academic general  
17 internal medicine inpatient service. *Arch Intern Med* [Internet]. 2007 Jan  
18 8;167(1):47–52.
- 19  
20 30. Kellett J, Deane B. The diagnoses and co-morbidity encountered in the hospital  
21 practice of acute internal medicine. *Eur J Intern Med*. 2007;18(6):467–73.
- 22  
23  
24  
25  
26  
27  
28  
29  
30  
31  
32  
33  
34  
35  
36  
37  
38  
39  
40  
41  
42  
43  
44  
45  
46  
47  
48  
49  
50  
51  
52  
53  
54  
55  
56  
57  
58  
59  
60

Table 1. Patient characteristics associated with duration of admission to GIM

| Patient Characteristic             | < 24 hours<br>N = 4245 | 24-72 hours<br>N = 13442 | All Others<br>N= 38368 | p-value |
|------------------------------------|------------------------|--------------------------|------------------------|---------|
| Age – median (IQR)                 | 63 (45, 78)            | 67 (50, 81)              | 74 (59, 84)            | <0.001  |
| Female – n (%)                     | 2155 (50.8)            | 6722 (50.0)              | 19026 (49.6)           | 0.288   |
| Charlson Comorbidity Index – n (%) |                        |                          |                        | <0.001  |
| 0                                  | 1846 (43.5)            | 4666 (34.7)              | 8809 (23.0)            |         |
| 1                                  | 962 (22.7)             | 3061 (22.8)              | 7737 (20.2)            |         |
| 2                                  | 557 (13.1)             | 2210 (16.4)              | 6785 (17.7)            |         |
| 3+                                 | 880 (20.7)             | 3505 (26.1)              | 15037 (39.2)           |         |
| Transported via Ambulance – n (%)  | 1531 (36.1)            | 5700 (42.4)              | 21533 (56.1)           | <0.001  |
| Admitted in prior 30 days* – n (%) | 372 (8.8)              | 1283 (9.5)               | 5315 (13.9)            | <0.001  |
| LAPS - mean (sd)                   | 13.0 (12.4)            | 16.3 (13.9)              | 21.4 (17.1)            | <0.001  |
| Admitted on Weekend – n (%)        | 929 (21.9)             | 3516 (26.2)              | 10152 (26.5)           | <0.001  |
| Time of Admission – n (%)          |                        |                          |                        | <0.001  |
| Day                                | 398 (9.4)              | 2832 (21.1)              | 8398 (21.9)            |         |
| Evening                            | 1795 (42.3)            | 5156 (38.4)              | 14828 (38.6)           |         |
| Night                              | 2052 (48.3)            | 5454 (40.6)              | 15142 (39.5)           |         |

Table 1 Legend: Hospital admissions were categorized as patients discharged home alive in less than 24 hours, 24 to 72 hours, and all other admissions. The day of admission was categorized as weekend (Saturday or Sunday) or weekday. The time of admission was categorized as 'day' (8:00 to 16:59:59), 'evening' (17:00 to 24:00), or 'night' (00:00:01 to 7:59:59). \*Admitted to GIM at a study site in prior 30 days. Statistical significance for differences across length-of-stay categories was calculated using chi-square analysis for categorical variables and Kruskal-Wallis test for continuous variables. LAPS: Laboratory-based acute physiology score.

Table 2. Multi-level regression models of patient, physician, and situational characteristics associated with short admissions to GIM.

| Characteristics                  | Model A: <24 hours           |         | Model B: <72 hours           |         |
|----------------------------------|------------------------------|---------|------------------------------|---------|
|                                  | Adjusted Odds Ratio (95% CI) | p-value | Adjusted Odds Ratio (95% CI) | p-value |
| <b>Patient Characteristics</b>   |                              |         |                              |         |
| Age                              | 0.99 (0.99, 0.99)            | <0.001  | 0.99 (0.99, 0.99)            | <0.001  |
| Female Sex (Patient)             | 0.96 (0.90, 1.02)            | 0.167   | 0.97 (0.94, 1.01)            | 0.126   |
| CCI Score 0                      | 1.97 (1.79, 2.16)            | <0.001  | 1.75 (1.66, 1.84)            | <0.001  |
| CCI Score 1                      | 1.63 (1.47, 1.79)            | <0.001  | 1.54 (1.46, 1.62)            | <0.001  |
| CCI Score 2                      | 1.20 (1.08, 1.34)            | 0.001   | 1.29 (1.21, 1.36)            | <0.001  |
| Not Transported via Ambulance    | 1.44 (1.34, 1.54)            | <0.001  | 1.47 (1.41, 1.53)            | <0.001  |
| Admitted in prior 30 days*       | 0.84 (0.75, 0.94)            | 0.003   | 0.77 (0.73, 0.82)            | <0.001  |
| LAPS                             | 0.97 (0.97, 0.98)            | <0.001  | 0.98 (0.98, 0.98)            | <0.001  |
| <b>Physician Characteristics</b> |                              |         |                              |         |
| Physician Sex Female             | 0.80 (0.74, 0.86)            | <0.001  | 0.82 (0.79, 0.86)            | <0.001  |
| Years Since Graduation           | 1.00 (1.00, 1.00)            | 0.776   | 1.00 (1.00, 1.00)            | 0.186   |
| <b>Situational Factors</b>       |                              |         |                              |         |
| Admitted Weekday                 | 1.26 (1.17, 1.36)            | <0.001  | 1.05 (1.01, 1.10)            | 0.022   |
| Admitted Evening                 | 2.61 (2.33, 2.92)            | <0.001  | 1.23 (1.17, 1.30)            | <0.001  |
| Admitted Night                   | 2.73 (2.44, 3.07)            | <0.001  | 1.29 (1.22, 1.37)            | <0.001  |
| GIM Admissions in Past 12 hours  | 1.05 (0.99, 1.12)            | 0.111   | 1.02 (0.98, 1.05)            | 0.401   |
| Admitted to Short Stay Unit      | 1.56 (1.39, 1.74)            | <0.001  | 2.35 (2.17, 2.54)            | <0.001  |
| Fiscal Year of Admission         | 1.09 (1.05, 1.14)            | <0.001  | 1.05 (1.03, 1.08)            | <0.001  |

Table 2 Legend: Adjusted odds ratios were derived from multi-level logistic regression models. Three-level models were fit, with patients nested within physicians nested within hospitals. Patient and situational characteristics were specified as level one, physician characteristics were specified as level two, and admitting hospital was specified as a fixed-effect level three variable. For variables with more than 2 categories, the reference categories were: CCI score 3 (high comorbidity) and admission in the day-time (vs evening and night). \*Admitted to GIM at a study site in prior 30 days. CCI Score: Charlson Comorbidity Index score. GIM: General Internal Medicine. LAPS: Laboratory-based acute physiology score.

Table 3. Fifteen most common discharge diagnoses among admissions to GIM with different durations.

| <24 Hours                        |           | 24-72 Hours                             |           | All Others                              |            |
|----------------------------------|-----------|-----------------------------------------|-----------|-----------------------------------------|------------|
| Diagnosis                        | N (%)     | Diagnosis                               | N (%)     | Diagnosis                               | N (%)      |
| Nonspecific chest pain           | 167 (4.1) | Pneumonia                               | 811 (6.5) | CHF                                     | 2251 (5.7) |
| Intestinal infection             | 163 (4.0) | COPD                                    | 731 (5.8) | Pneumonia                               | 2028 (5.1) |
| COPD                             | 153 (3.8) | Urinary tract infections                | 676 (5.4) | Urinary tract infections                | 1823 (4.6) |
| Pneumonia                        | 150 (3.7) | Gastrointestinal hemorrhage             | 598 (4.8) | COPD                                    | 1740 (4.4) |
| Syncope                          | 124 (3.1) | CHF                                     | 580 (4.6) | Delirium, dementia, cognitive disorders | 1444 (3.7) |
| Urinary tract infections         | 123 (3.0) | Fluid and electrolyte disorders         | 445 (3.5) | Gastrointestinal hemorrhage             | 1170 (3.0) |
| Fluid and electrolyte disorders  | 112 (2.8) | Intestinal infection                    | 445 (3.5) | Septicemia                              | 1016 (2.6) |
| Gastrointestinal hemorrhage      | 111 (2.7) | Syncope                                 | 376 (3.0) | Acute cerebrovascular disease           | 996 (2.5)  |
| DM with complications            | 111 (2.7) | DM with complications                   | 332 (2.6) | Fluid and electrolyte disorders         | 854 (2.2)  |
| CHF                              | 101 (2.5) | Skin and subcutaneous tissue infections | 257 (2.0) | DM with complications                   | 833 (2.1)  |
| Adverse effects of medical drugs | 100 (2.5) | Alcohol-related disorders               | 255 (2.0) | Intestinal infection                    | 822 (2.1)  |
| Epilepsy; convulsions            | 100 (2.5) | Nonspecific chest pain                  | 238 (1.9) | Acute renal failure                     | 806 (2.0)  |
| Alcohol-related disorders        | 99 (2.4)  | Influenza                               | 233 (1.9) | Skin and subcutaneous tissue infections | 793 (2.0)  |
| Dizziness or vertigo             | 92 (2.3)  | Adverse effects of medical drugs        | 222 (1.8) | Other connective tissue disease         | 780 (2.0)  |
| Other lower respiratory disease  | 90 (2.2)  | Pancreatic disorders                    | 222 (1.8) | Aspiration pneumonitis                  | 767 (1.9)  |

Table 3 Legend: Grey shading: Diagnosis among the top 15 across all categories. Green shading: Diagnosis among top 15 in admissions <24 and 24-72 hours only. Blue (<24 hours), purple (24-72 hours), and red shading (all others): Diagnosis among 15 most common in each respective category only. Hospital admissions were categorized as patients discharged home alive in less than 24 hours, 24 to 72 hours, and all other admissions. The 15 most common discharge diagnoses were identified by the Clinical Classifications Software categorization of ICD-10 codes. COPD: Chronic obstructive pulmonary disease and bronchiectasis; DM: Diabetes mellitus; CHF: Congestive heart failure.

Table 4. Resource use among GIM admissions of varying duration.

| Resource                                       | <24 hours<br>N = 4245 | 24-72 hours<br>N = 13442 | All Others<br>N = 38368 |
|------------------------------------------------|-----------------------|--------------------------|-------------------------|
| Time in Emergency Department – mean hours (SD) | 14.8 (6.6)            | 15.7 (9.0)               | 16.4 (9.9)              |
| Intravenous Medication* – n (%)                | 2788 (65.7)           | 10722 (79.8)             | 33022 (86.1)            |
| Radiography* – n (%)                           | 2803 (66.0)           | 10013 (74.5)             | 33260 (86.7)            |
| Computed tomography* – n (%)                   | 1561 (36.8)           | 5254 (39.1)              | 21772 (56.7)            |
| Ultrasonography* – n (%)                       | 418 (9.8)             | 2363 (17.6)              | 12110 (31.6)            |
| Magnetic Resonance Imaging* – n (%)            | 144 (3.4)             | 842 (6.3)                | 4983 (13.0)             |
| Red Blood Cell transfusion* – n (%)            | 86 (2.0)              | 593 (4.4)                | 4522 (11.8)             |
| Endoscopy* – n (%)                             | 92 (2.2)              | 1053 (7.8)               | 4037 (10.5)             |
| Bronchoscopy* – n (%)                          | 1 (0.0)               | 39 (0.3)                 | 965 (2.5)               |
| Intensive Care Unit admission – n (%)          | 18 (0.4)              | 101 (0.8)                | 2509 (6.5)              |
| No advanced interventions <sup>†</sup> – n (%) | 779 (18.4)            | 1146 (8.5)               | 1347 (3.5)              |

Table 4 Legend: \*Number of admissions that used at least one of this test or treatment.

<sup>†</sup>Number of admissions in which none of the following tests or treatments were used:

intravenous medication, computed tomography, ultrasonography, magnetic resonance imaging, endoscopy, bronchoscopy or intensive care unit.

**Supplementary Tables**

“Patient, physician, and situational factors associated with short hospital admissions in General Internal Medicine”

Table S1. Baseline characteristics among patients discharged home alive within 24 hours of admission, categorized by time of admission.

Table S2. Baseline characteristics among patients discharged home alive within 72 hours of admission, categorized by time of admission.

Table S3. Baseline characteristics among patients discharged home alive within 24 hours of admission, categorized by weekend versus weekday admission.

Table S4. Baseline characteristics among patients discharged home alive within 72 hours of admission, categorized by weekend versus weekday admission.

Confidential

Table S1. Baseline characteristics among patients discharged home alive within 24 hours of admission, categorized by time of admission.

| Patient Characteristic             | Admitted in Day<br>(N=398) | Admitted in Evening<br>(N=1795) | Admitted in Night<br>(N=2052) | p-value |
|------------------------------------|----------------------------|---------------------------------|-------------------------------|---------|
| Age – median (IQR)                 | 56 (36, 74)                | 63 (47, 78)                     | 63 (45, 79)                   | <0.001  |
| Female – n (%)                     | 203 (51.0)                 | 894 (49.8)                      | 1058 (51.6)                   | 0.552   |
| Charlson Comorbidity Index – n (%) |                            |                                 |                               | 0.041   |
| 0                                  | 198 (49.7)                 | 748 (41.7)                      | 900 (43.9)                    |         |
| 1                                  | 81 (20.4)                  | 397 (22.1)                      | 484 (23.6)                    |         |
| 2                                  | 44 (11.1)                  | 249 (13.9)                      | 264 (12.9)                    |         |
| 3+                                 | 75 (18.8)                  | 401 (22.3)                      | 404 (19.7)                    |         |
| Transported via Ambulance – n (%)  | 142 (35.7)                 | 650 (36.2)                      | 739 (36.0)                    | 0.978   |
| Admitted in prior 30 days* – n (%) | 48 (12.1)                  | 170 (9.5)                       | 154 (7.5)                     | 0.005   |
| LAPS - mean (sd)                   | 12.9 (12.0)                | 13.0 (12.2)                     | 13.0 (12.7)                   | 0.984   |

Table S1 Legend: The time of admission was categorized as 'day' (8:00 to 16:59:59), 'evening' (17:00 to 24:00), or 'night' (00:00:01 to 7:59:59). \*Admitted to GIM at a study site in prior 30 days. Statistical significance for differences across categories was calculated using chi-square analysis for categorical variables and Kruskal-Wallis test for continuous variables. LAPS: Laboratory-based acute physiology score.

Table S2. Baseline characteristics among patients discharged home alive within 72 hours of admission, categorized by time of admission.

| Patient Characteristic             | Admitted in Day<br>(N=3230) | Admitted in Evening<br>(N=6951) | Admitted in Night<br>(N=7506) | p-value |
|------------------------------------|-----------------------------|---------------------------------|-------------------------------|---------|
| Age – median (IQR)                 | 64.00 [47.00, 80.00]        | 67.00 [51.00, 81.00]            | 66.00 [49.00, 80.00]          | <0.001  |
| Female – n (%)                     | 1536 (47.6)                 | 3553 (51.1)                     | 3788 (50.5)                   | 0.003   |
| Charlson Comorbidity Index – n (%) |                             |                                 |                               | 0.249   |
| 0                                  | 1243 (38.5)                 | 2518 (36.2)                     | 2751 (36.7)                   |         |
| 1                                  | 734 (22.7)                  | 1564 (22.5)                     | 1725 (23.0)                   |         |
| 2                                  | 496 (15.4)                  | 1092 (15.7)                     | 1179 (15.7)                   |         |
| 3+                                 | 757 (23.4)                  | 1777 (25.6)                     | 1851 (24.7)                   |         |
| Transported via Ambulance – n (%)  | 1488 (46.1)                 | 2683 (38.6)                     | 3060 (40.8)                   | <0.001  |
| Admitted in prior 30 days* – n (%) | 334 (10.3)                  | 656 (9.4)                       | 665 (8.9)                     | 0.052   |
| LAPS - mean (sd)                   | 15.6 (13.5)                 | 15.5 (13.7)                     | 15.5 (13.6)                   | 0.89    |

Table S2 Legend: The time of admission was categorized as 'day' (8:00 to 16:59:59), 'evening' (17:00 to 24:00), or 'night' (00:00:01 to 7:59:59). \*Admitted to GIM at a study site in prior 30 days. Statistical significance for differences across categories was calculated using chi-square analysis for categorical variables and Kruskal-Wallis test for continuous variables. LAPS: Laboratory-based acute physiology score.



Table S3. Baseline characteristics among patients discharged home alive within 24 hours of admission, categorized by weekend versus weekday admission.

| Patient Characteristic             | Admitted on Weekday (N=3316) | Admitted on Weekend (N=929) | p-value |
|------------------------------------|------------------------------|-----------------------------|---------|
| Age – median (IQR)                 | 63 (46, 79)                  | 61 (44, 77)                 | 0.138   |
| Female – n (%)                     | 1705 (51.4)                  | 450 (48.4)                  | 0.117   |
| Charlson Comorbidity Index – n (%) |                              |                             | 0.887   |
| 0                                  | 1436 (43.3)                  | 410 (44.1)                  |         |
| 1                                  | 760 (22.9)                   | 202 (21.7)                  |         |
| 2                                  | 436 (13.1)                   | 121 (13.0)                  |         |
| 3+                                 | 684 (20.6)                   | 196 (21.1)                  |         |
| Transported via Ambulance – n (%)  | 1196 (36.1)                  | 335 (36.1)                  | 1       |
| Admitted in prior 30 days* – n (%) | 273 (8.2)                    | 99 (10.7)                   | 0.025   |
| LAPS - mean (sd)                   | 12.8 (12.2)                  | 13.4 (13.0)                 | 0.19    |

Table S3 Legend: The day of admission was categorized as 'weekday' (Monday to Friday) or 'weekend' (Saturday and Sunday). \*Admitted to GIM at a study site in prior 30 days. Statistical significance for differences across categories was calculated using chi-square analysis for categorical variables and Kruskal-Wallis test for continuous variables. LAPS: Laboratory-based acute physiology score.

Table S4. Baseline characteristics among patients discharged home alive within 72 hours of admission, categorized by weekend versus weekday admission.

| Patient Characteristic             | Admitted on Weekday (N=13,242) | Admitted on Weekend (N=4,445) | p-value |
|------------------------------------|--------------------------------|-------------------------------|---------|
| Age – median (IQR)                 | 66 (49, 80)                    | 67 (49, 81)                   | 0.21    |
| Female – n (%)                     | 6703 (50.6)                    | 2174 (48.9)                   | 0.05    |
| Charlson Comorbidity Index – n (%) |                                |                               | 0.642   |
| 0                                  | 4877 (36.8)                    | 1635 (36.8)                   |         |
| 1                                  | 2998 (22.6)                    | 1025 (23.1)                   |         |
| 2                                  | 2056 (15.5)                    | 711 (16.0)                    |         |
| 3+                                 | 3311 (25.0)                    | 1074 (24.2)                   |         |
| Transported via Ambulance – n (%)  | 5303 (40.0)                    | 1928 (43.4)                   | <0.001  |
| Admitted in prior 30 days* – n (%) | 1222 (9.2)                     | 433 (9.7)                     | 0.324   |
| LAPS - mean (sd)                   | 15.4 (13.6)                    | 16.0 (13.6)                   | 0.004   |

Table S4 Legend: The day of admission was categorized as 'weekday' (Monday to Friday) or 'weekend' (Saturday and Sunday). \*Admitted to GIM at a study site in prior 30 days. Statistical significance for differences across categories was calculated using chi-square analysis for categorical variables and Kruskal-Wallis test for continuous variables. LAPS: Laboratory-based acute physiology score.

**STROBE statement – checklist of items, extended from the STROBE statement, that should be reported in observational studies that collect health data.**

| Item No. | STROBE items                                                                                                                                                                               | Location in manuscript where items are reported | RECORD items                                                                                                                                                                                                                                                                                                                                                                                                                                       | Location in manuscript where items are reported |
|----------|--------------------------------------------------------------------------------------------------------------------------------------------------------------------------------------------|-------------------------------------------------|----------------------------------------------------------------------------------------------------------------------------------------------------------------------------------------------------------------------------------------------------------------------------------------------------------------------------------------------------------------------------------------------------------------------------------------------------|-------------------------------------------------|
| 1        | (a) Indicate the study's design with a commonly used term in the title or the abstract (b) Provide in the abstract an informative and balanced summary of what was done and what was found |                                                 | <p>RECORD 1.1: The type of data used should be specified in the title or abstract. When possible, the name of the databases used should be included.</p> <p>RECORD 1.2: If applicable, the geographic region and timeframe within which the study took place should be reported in the title or abstract.</p> <p>RECORD 1.3: If linkage between databases was conducted for the study, this should be clearly stated in the title or abstract.</p> | Abstract                                        |
| 2        | Explain the scientific background and rationale for the investigation being reported                                                                                                       |                                                 |                                                                                                                                                                                                                                                                                                                                                                                                                                                    | Introduction                                    |
| 3        | State specific objectives, including any prespecified hypotheses                                                                                                                           |                                                 |                                                                                                                                                                                                                                                                                                                                                                                                                                                    | Introduction                                    |
| 4        | Present key elements of study design early in the paper                                                                                                                                    |                                                 |                                                                                                                                                                                                                                                                                                                                                                                                                                                    | Methods - Design, Study Design, Participants    |
| 5        | Describe the setting, locations, and relevant dates, including periods of recruitment, exposure, follow-up, and data collection                                                            |                                                 |                                                                                                                                                                                                                                                                                                                                                                                                                                                    | Methods - Design, Study Design, Participants    |

|                                                                                                                                                       |   |                                                                                                                                                                                                                                                                                                                                                                                                                                                                                                                                                                                                                                                                                                                              |  |                                                                                                                                                                                                                                                                                                                                                                                                                                                                                                                                                                                                                                                                                                      |                                   |
|-------------------------------------------------------------------------------------------------------------------------------------------------------|---|------------------------------------------------------------------------------------------------------------------------------------------------------------------------------------------------------------------------------------------------------------------------------------------------------------------------------------------------------------------------------------------------------------------------------------------------------------------------------------------------------------------------------------------------------------------------------------------------------------------------------------------------------------------------------------------------------------------------------|--|------------------------------------------------------------------------------------------------------------------------------------------------------------------------------------------------------------------------------------------------------------------------------------------------------------------------------------------------------------------------------------------------------------------------------------------------------------------------------------------------------------------------------------------------------------------------------------------------------------------------------------------------------------------------------------------------------|-----------------------------------|
| 1<br>2<br>3<br>4<br>5<br>6<br>7<br>8<br>9<br>10<br>11<br>12<br>13<br>14<br>15<br>16<br>17<br>18<br>19<br>20<br>21<br>22<br>23<br>24<br>25<br>26<br>27 | 6 | <p>(a) <i>Cohort study</i> - Give the eligibility criteria, and the sources and methods of selection of participants. Describe methods of follow-up</p> <p><i>Case-control study</i> - Give the eligibility criteria, and the sources and methods of case ascertainment and control selection. Give the rationale for the choice of cases and controls</p> <p><i>Cross-sectional study</i> - Give the eligibility criteria, and the sources and methods of selection of participants</p> <p>(b) <i>Cohort study</i> - For matched studies, give matching criteria and number of exposed and unexposed</p> <p><i>Case-control study</i> - For matched studies, give matching criteria and the number of controls per case</p> |  | <p>RECORD 6.1: The methods of study population selection (such as codes or algorithms used to identify subjects) should be listed in detail. If this is not possible, an explanation should be provided.</p> <p>RECORD 6.2: Any validation studies of the codes or algorithms used to select the population should be referenced. If validation was conducted for this study and not published elsewhere, detailed methods and results should be provided.</p> <p>RECORD 6.3: If the study involved linkage of databases, consider use of a flow diagram or other graphical display to demonstrate the data linkage process, including the number of individuals with linked data at each stage.</p> | Methods - Design, S<br>Participan |
| 28<br>29<br>30<br>31<br>32<br>33<br>34                                                                                                                | 7 | Clearly define all outcomes, exposures, predictors, potential confounders, and effect modifiers. Give diagnostic criteria, if applicable.                                                                                                                                                                                                                                                                                                                                                                                                                                                                                                                                                                                    |  | RECORD 7.1: A complete list of codes and algorithms used to classify exposures, outcomes, confounders, and effect modifiers should be provided. If these cannot be reported, an explanation should be provided.                                                                                                                                                                                                                                                                                                                                                                                                                                                                                      | Methods - Outcomes<br>Measures    |
| 35<br>36<br>37<br>38<br>39<br>40<br>41<br>42                                                                                                          | 8 | For each variable of interest, give sources of data and details of methods of assessment (measurement). Describe comparability of assessment methods if there is more than one group                                                                                                                                                                                                                                                                                                                                                                                                                                                                                                                                         |  |                                                                                                                                                                                                                                                                                                                                                                                                                                                                                                                                                                                                                                                                                                      | Methods - Sources                 |
| 43                                                                                                                                                    | 9 | Describe any efforts to address                                                                                                                                                                                                                                                                                                                                                                                                                                                                                                                                                                                                                                                                                              |  |                                                                                                                                                                                                                                                                                                                                                                                                                                                                                                                                                                                                                                                                                                      | Statistical                       |

|    |    |                                                                                                                               |  |                                                                                                                                                       |                                |
|----|----|-------------------------------------------------------------------------------------------------------------------------------|--|-------------------------------------------------------------------------------------------------------------------------------------------------------|--------------------------------|
| 1  |    | potential sources of bias                                                                                                     |  |                                                                                                                                                       | Analysis                       |
| 2  | 10 | Explain how the study size was arrived at                                                                                     |  |                                                                                                                                                       | Methods - Design, S            |
| 3  |    |                                                                                                                               |  |                                                                                                                                                       | Participar                     |
| 4  |    |                                                                                                                               |  |                                                                                                                                                       |                                |
| 5  | 11 | Explain how quantitative variables were handled in the analyses. If applicable, describe which groupings were chosen, and why |  |                                                                                                                                                       | Methods - Outcomes Measures    |
| 6  |    |                                                                                                                               |  |                                                                                                                                                       |                                |
| 7  |    |                                                                                                                               |  |                                                                                                                                                       |                                |
| 8  |    |                                                                                                                               |  |                                                                                                                                                       |                                |
| 9  |    |                                                                                                                               |  |                                                                                                                                                       |                                |
| 10 |    |                                                                                                                               |  |                                                                                                                                                       |                                |
| 11 | 12 | (a) Describe all statistical methods, including those used to control for confounding                                         |  |                                                                                                                                                       | Methods - Statistical Analysis |
| 12 |    | (b) Describe any methods used to examine subgroups and interactions                                                           |  |                                                                                                                                                       |                                |
| 13 |    | (c) Explain how missing data were addressed                                                                                   |  |                                                                                                                                                       |                                |
| 14 |    | (d) <i>Cohort study</i> - If applicable, explain how loss to follow-up was addressed                                          |  |                                                                                                                                                       |                                |
| 15 |    | <i>Case-control study</i> - If applicable, explain how matching of cases and controls was addressed                           |  |                                                                                                                                                       |                                |
| 16 |    | <i>Cross-sectional study</i> - If applicable, describe analytical methods taking account of sampling strategy                 |  |                                                                                                                                                       |                                |
| 17 |    | (e) Describe any sensitivity analyses                                                                                         |  |                                                                                                                                                       |                                |
| 18 |    |                                                                                                                               |  |                                                                                                                                                       |                                |
| 19 |    |                                                                                                                               |  |                                                                                                                                                       |                                |
| 20 |    |                                                                                                                               |  |                                                                                                                                                       |                                |
| 21 |    |                                                                                                                               |  |                                                                                                                                                       |                                |
| 22 |    |                                                                                                                               |  |                                                                                                                                                       |                                |
| 23 |    |                                                                                                                               |  |                                                                                                                                                       |                                |
| 24 |    |                                                                                                                               |  |                                                                                                                                                       |                                |
| 25 |    |                                                                                                                               |  |                                                                                                                                                       |                                |
| 26 |    |                                                                                                                               |  |                                                                                                                                                       |                                |
| 27 |    |                                                                                                                               |  |                                                                                                                                                       |                                |
| 28 |    |                                                                                                                               |  |                                                                                                                                                       |                                |
| 29 |    |                                                                                                                               |  |                                                                                                                                                       |                                |
| 30 |    |                                                                                                                               |  |                                                                                                                                                       |                                |
| 31 |    |                                                                                                                               |  |                                                                                                                                                       |                                |
| 32 |    |                                                                                                                               |  |                                                                                                                                                       |                                |
| 33 |    |                                                                                                                               |  |                                                                                                                                                       |                                |
| 34 |    |                                                                                                                               |  |                                                                                                                                                       |                                |
| 35 |    | ..                                                                                                                            |  | RECORD 12.1: Authors should describe the extent to which the investigators had access to the database population used to create the study population. | Methods - Sources              |
| 36 |    |                                                                                                                               |  | RECORD 12.2: Authors should provide information on the data                                                                                           |                                |
| 37 |    |                                                                                                                               |  |                                                                                                                                                       |                                |
| 38 |    |                                                                                                                               |  |                                                                                                                                                       |                                |
| 39 |    |                                                                                                                               |  |                                                                                                                                                       |                                |
| 40 |    |                                                                                                                               |  |                                                                                                                                                       |                                |
| 41 |    |                                                                                                                               |  |                                                                                                                                                       |                                |
| 42 |    |                                                                                                                               |  |                                                                                                                                                       |                                |
| 43 |    |                                                                                                                               |  |                                                                                                                                                       |                                |
| 44 |    |                                                                                                                               |  |                                                                                                                                                       |                                |
| 45 |    |                                                                                                                               |  |                                                                                                                                                       |                                |
| 46 |    |                                                                                                                               |  |                                                                                                                                                       |                                |
| 47 |    |                                                                                                                               |  |                                                                                                                                                       |                                |
| 48 |    |                                                                                                                               |  |                                                                                                                                                       |                                |
| 49 |    |                                                                                                                               |  |                                                                                                                                                       |                                |
| 50 |    |                                                                                                                               |  |                                                                                                                                                       |                                |
| 51 |    |                                                                                                                               |  |                                                                                                                                                       |                                |
| 52 |    |                                                                                                                               |  |                                                                                                                                                       |                                |
| 53 |    |                                                                                                                               |  |                                                                                                                                                       |                                |
| 54 |    |                                                                                                                               |  |                                                                                                                                                       |                                |
| 55 |    |                                                                                                                               |  |                                                                                                                                                       |                                |
| 56 |    |                                                                                                                               |  |                                                                                                                                                       |                                |
| 57 |    |                                                                                                                               |  |                                                                                                                                                       |                                |
| 58 |    |                                                                                                                               |  |                                                                                                                                                       |                                |
| 59 |    |                                                                                                                               |  |                                                                                                                                                       |                                |
| 60 |    |                                                                                                                               |  |                                                                                                                                                       |                                |

|    |    |                                                                                                                                                                                                                                                                                                                                                 |  |                                                                                                                                                                                                                                                                                                                    |                 |
|----|----|-------------------------------------------------------------------------------------------------------------------------------------------------------------------------------------------------------------------------------------------------------------------------------------------------------------------------------------------------|--|--------------------------------------------------------------------------------------------------------------------------------------------------------------------------------------------------------------------------------------------------------------------------------------------------------------------|-----------------|
| 1  |    |                                                                                                                                                                                                                                                                                                                                                 |  | cleaning methods used in the study.                                                                                                                                                                                                                                                                                |                 |
| 2  |    | ..                                                                                                                                                                                                                                                                                                                                              |  | RECORD 12.3: State whether the study included person-level, institutional-level, or other data linkage across two or more databases. The methods of linkage and methods of linkage quality evaluation should be provided.                                                                                          | Methods Sources |
| 3  |    |                                                                                                                                                                                                                                                                                                                                                 |  |                                                                                                                                                                                                                                                                                                                    |                 |
| 4  |    |                                                                                                                                                                                                                                                                                                                                                 |  |                                                                                                                                                                                                                                                                                                                    |                 |
| 5  |    |                                                                                                                                                                                                                                                                                                                                                 |  |                                                                                                                                                                                                                                                                                                                    |                 |
| 6  |    |                                                                                                                                                                                                                                                                                                                                                 |  |                                                                                                                                                                                                                                                                                                                    |                 |
| 7  |    |                                                                                                                                                                                                                                                                                                                                                 |  |                                                                                                                                                                                                                                                                                                                    |                 |
| 8  |    |                                                                                                                                                                                                                                                                                                                                                 |  |                                                                                                                                                                                                                                                                                                                    |                 |
| 9  |    |                                                                                                                                                                                                                                                                                                                                                 |  |                                                                                                                                                                                                                                                                                                                    |                 |
| 10 |    |                                                                                                                                                                                                                                                                                                                                                 |  |                                                                                                                                                                                                                                                                                                                    |                 |
| 11 | 13 | (a) Report the numbers of individuals at each stage of the study ( <i>e.g.</i> , numbers potentially eligible, examined for eligibility, confirmed eligible, included in the study, completing follow-up, and analysed)<br>(b) Give reasons for non-participation at each stage.<br>(c) Consider use of a flow diagram                          |  | RECORD 13.1: Describe in detail the selection of the persons included in the study ( <i>i.e.</i> , study population selection) including filtering based on data quality, data availability and linkage. The selection of included persons can be described in the text and/or by means of the study flow diagram. | Results         |
| 12 |    |                                                                                                                                                                                                                                                                                                                                                 |  |                                                                                                                                                                                                                                                                                                                    |                 |
| 13 |    |                                                                                                                                                                                                                                                                                                                                                 |  |                                                                                                                                                                                                                                                                                                                    |                 |
| 14 |    |                                                                                                                                                                                                                                                                                                                                                 |  |                                                                                                                                                                                                                                                                                                                    |                 |
| 15 |    |                                                                                                                                                                                                                                                                                                                                                 |  |                                                                                                                                                                                                                                                                                                                    |                 |
| 16 |    |                                                                                                                                                                                                                                                                                                                                                 |  |                                                                                                                                                                                                                                                                                                                    |                 |
| 17 |    |                                                                                                                                                                                                                                                                                                                                                 |  |                                                                                                                                                                                                                                                                                                                    |                 |
| 18 |    |                                                                                                                                                                                                                                                                                                                                                 |  |                                                                                                                                                                                                                                                                                                                    |                 |
| 19 |    |                                                                                                                                                                                                                                                                                                                                                 |  |                                                                                                                                                                                                                                                                                                                    |                 |
| 20 |    |                                                                                                                                                                                                                                                                                                                                                 |  |                                                                                                                                                                                                                                                                                                                    |                 |
| 21 |    |                                                                                                                                                                                                                                                                                                                                                 |  |                                                                                                                                                                                                                                                                                                                    |                 |
| 22 |    |                                                                                                                                                                                                                                                                                                                                                 |  |                                                                                                                                                                                                                                                                                                                    |                 |
| 23 |    |                                                                                                                                                                                                                                                                                                                                                 |  |                                                                                                                                                                                                                                                                                                                    |                 |
| 24 | 14 | (a) Give characteristics of study participants ( <i>e.g.</i> , demographic, clinical, social) and information on exposures and potential confounders<br>(b) Indicate the number of participants with missing data for each variable of interest<br>(c) <i>Cohort study</i> - summarise follow-up time ( <i>e.g.</i> , average and total amount) |  |                                                                                                                                                                                                                                                                                                                    | Results         |
| 25 |    |                                                                                                                                                                                                                                                                                                                                                 |  |                                                                                                                                                                                                                                                                                                                    |                 |
| 26 |    |                                                                                                                                                                                                                                                                                                                                                 |  |                                                                                                                                                                                                                                                                                                                    |                 |
| 27 |    |                                                                                                                                                                                                                                                                                                                                                 |  |                                                                                                                                                                                                                                                                                                                    |                 |
| 28 |    |                                                                                                                                                                                                                                                                                                                                                 |  |                                                                                                                                                                                                                                                                                                                    |                 |
| 29 |    |                                                                                                                                                                                                                                                                                                                                                 |  |                                                                                                                                                                                                                                                                                                                    |                 |
| 30 |    |                                                                                                                                                                                                                                                                                                                                                 |  |                                                                                                                                                                                                                                                                                                                    |                 |
| 31 |    |                                                                                                                                                                                                                                                                                                                                                 |  |                                                                                                                                                                                                                                                                                                                    |                 |
| 32 |    |                                                                                                                                                                                                                                                                                                                                                 |  |                                                                                                                                                                                                                                                                                                                    |                 |
| 33 |    |                                                                                                                                                                                                                                                                                                                                                 |  |                                                                                                                                                                                                                                                                                                                    |                 |
| 34 |    |                                                                                                                                                                                                                                                                                                                                                 |  |                                                                                                                                                                                                                                                                                                                    |                 |
| 35 |    |                                                                                                                                                                                                                                                                                                                                                 |  |                                                                                                                                                                                                                                                                                                                    |                 |
| 36 | 15 | <i>Cohort study</i> - Report numbers of outcome events or summary measures over time<br><i>Case-control study</i> - Report numbers in each exposure category, or summary measures of exposure                                                                                                                                                   |  |                                                                                                                                                                                                                                                                                                                    | Results         |
| 37 |    |                                                                                                                                                                                                                                                                                                                                                 |  |                                                                                                                                                                                                                                                                                                                    |                 |
| 38 |    |                                                                                                                                                                                                                                                                                                                                                 |  |                                                                                                                                                                                                                                                                                                                    |                 |
| 39 |    |                                                                                                                                                                                                                                                                                                                                                 |  |                                                                                                                                                                                                                                                                                                                    |                 |
| 40 |    |                                                                                                                                                                                                                                                                                                                                                 |  |                                                                                                                                                                                                                                                                                                                    |                 |
| 41 |    |                                                                                                                                                                                                                                                                                                                                                 |  |                                                                                                                                                                                                                                                                                                                    |                 |
| 42 |    |                                                                                                                                                                                                                                                                                                                                                 |  |                                                                                                                                                                                                                                                                                                                    |                 |
| 43 |    |                                                                                                                                                                                                                                                                                                                                                 |  |                                                                                                                                                                                                                                                                                                                    |                 |

|    |    |                                                                                                                                                                                                                                                                                                                                                                                                                 |  |                                                                                                                                                                                                                                                                                                          |            |
|----|----|-----------------------------------------------------------------------------------------------------------------------------------------------------------------------------------------------------------------------------------------------------------------------------------------------------------------------------------------------------------------------------------------------------------------|--|----------------------------------------------------------------------------------------------------------------------------------------------------------------------------------------------------------------------------------------------------------------------------------------------------------|------------|
| 1  |    | <i>Cross-sectional study</i> - Report numbers of outcome events or summary measures                                                                                                                                                                                                                                                                                                                             |  |                                                                                                                                                                                                                                                                                                          |            |
| 2  |    |                                                                                                                                                                                                                                                                                                                                                                                                                 |  |                                                                                                                                                                                                                                                                                                          |            |
| 3  |    |                                                                                                                                                                                                                                                                                                                                                                                                                 |  |                                                                                                                                                                                                                                                                                                          |            |
| 4  | 16 | (a) Give unadjusted estimates and, if applicable, confounder-adjusted estimates and their precision (e.g., 95% confidence interval). Make clear which confounders were adjusted for and why they were included<br>(b) Report category boundaries when continuous variables were categorized<br>(c) If relevant, consider translating estimates of relative risk into absolute risk for a meaningful time period |  |                                                                                                                                                                                                                                                                                                          | Results    |
| 5  |    |                                                                                                                                                                                                                                                                                                                                                                                                                 |  |                                                                                                                                                                                                                                                                                                          |            |
| 6  |    |                                                                                                                                                                                                                                                                                                                                                                                                                 |  |                                                                                                                                                                                                                                                                                                          |            |
| 7  |    |                                                                                                                                                                                                                                                                                                                                                                                                                 |  |                                                                                                                                                                                                                                                                                                          |            |
| 8  |    |                                                                                                                                                                                                                                                                                                                                                                                                                 |  |                                                                                                                                                                                                                                                                                                          |            |
| 9  |    |                                                                                                                                                                                                                                                                                                                                                                                                                 |  |                                                                                                                                                                                                                                                                                                          |            |
| 10 |    |                                                                                                                                                                                                                                                                                                                                                                                                                 |  |                                                                                                                                                                                                                                                                                                          |            |
| 11 |    |                                                                                                                                                                                                                                                                                                                                                                                                                 |  |                                                                                                                                                                                                                                                                                                          |            |
| 12 |    |                                                                                                                                                                                                                                                                                                                                                                                                                 |  |                                                                                                                                                                                                                                                                                                          |            |
| 13 |    |                                                                                                                                                                                                                                                                                                                                                                                                                 |  |                                                                                                                                                                                                                                                                                                          |            |
| 14 |    |                                                                                                                                                                                                                                                                                                                                                                                                                 |  |                                                                                                                                                                                                                                                                                                          |            |
| 15 |    |                                                                                                                                                                                                                                                                                                                                                                                                                 |  |                                                                                                                                                                                                                                                                                                          |            |
| 16 |    |                                                                                                                                                                                                                                                                                                                                                                                                                 |  |                                                                                                                                                                                                                                                                                                          |            |
| 17 |    |                                                                                                                                                                                                                                                                                                                                                                                                                 |  |                                                                                                                                                                                                                                                                                                          |            |
| 18 |    |                                                                                                                                                                                                                                                                                                                                                                                                                 |  |                                                                                                                                                                                                                                                                                                          |            |
| 19 |    |                                                                                                                                                                                                                                                                                                                                                                                                                 |  |                                                                                                                                                                                                                                                                                                          |            |
| 20 | 17 | Report other analyses done— e.g., analyses of subgroups and interactions, and sensitivity analyses                                                                                                                                                                                                                                                                                                              |  |                                                                                                                                                                                                                                                                                                          | Results    |
| 21 |    |                                                                                                                                                                                                                                                                                                                                                                                                                 |  |                                                                                                                                                                                                                                                                                                          |            |
| 22 |    |                                                                                                                                                                                                                                                                                                                                                                                                                 |  |                                                                                                                                                                                                                                                                                                          |            |
| 23 |    |                                                                                                                                                                                                                                                                                                                                                                                                                 |  |                                                                                                                                                                                                                                                                                                          |            |
| 24 |    |                                                                                                                                                                                                                                                                                                                                                                                                                 |  |                                                                                                                                                                                                                                                                                                          |            |
| 25 |    |                                                                                                                                                                                                                                                                                                                                                                                                                 |  |                                                                                                                                                                                                                                                                                                          |            |
| 26 | 18 | Summarise key results with reference to study objectives                                                                                                                                                                                                                                                                                                                                                        |  |                                                                                                                                                                                                                                                                                                          | Interpreta |
| 27 |    |                                                                                                                                                                                                                                                                                                                                                                                                                 |  |                                                                                                                                                                                                                                                                                                          |            |
| 28 | 19 | Discuss limitations of the study, taking into account sources of potential bias or imprecision. Discuss both direction and magnitude of any potential bias                                                                                                                                                                                                                                                      |  | RECORD 19.1: Discuss the implications of using data that were not created or collected to answer the specific research question(s). Include discussion of misclassification bias, unmeasured confounding, missing data, and changing eligibility over time, as they pertain to the study being reported. | Interpreta |
| 29 |    |                                                                                                                                                                                                                                                                                                                                                                                                                 |  |                                                                                                                                                                                                                                                                                                          |            |
| 30 |    |                                                                                                                                                                                                                                                                                                                                                                                                                 |  |                                                                                                                                                                                                                                                                                                          |            |
| 31 |    |                                                                                                                                                                                                                                                                                                                                                                                                                 |  |                                                                                                                                                                                                                                                                                                          |            |
| 32 |    |                                                                                                                                                                                                                                                                                                                                                                                                                 |  |                                                                                                                                                                                                                                                                                                          |            |
| 33 |    |                                                                                                                                                                                                                                                                                                                                                                                                                 |  |                                                                                                                                                                                                                                                                                                          |            |
| 34 |    |                                                                                                                                                                                                                                                                                                                                                                                                                 |  |                                                                                                                                                                                                                                                                                                          |            |
| 35 |    |                                                                                                                                                                                                                                                                                                                                                                                                                 |  |                                                                                                                                                                                                                                                                                                          |            |
| 36 |    |                                                                                                                                                                                                                                                                                                                                                                                                                 |  |                                                                                                                                                                                                                                                                                                          |            |
| 37 |    |                                                                                                                                                                                                                                                                                                                                                                                                                 |  |                                                                                                                                                                                                                                                                                                          |            |
| 38 | 20 | Give a cautious overall interpretation of results considering objectives, limitations, multiplicity of analyses, results from similar                                                                                                                                                                                                                                                                           |  |                                                                                                                                                                                                                                                                                                          | Interpreta |
| 39 |    |                                                                                                                                                                                                                                                                                                                                                                                                                 |  |                                                                                                                                                                                                                                                                                                          |            |
| 40 |    |                                                                                                                                                                                                                                                                                                                                                                                                                 |  |                                                                                                                                                                                                                                                                                                          |            |
| 41 |    |                                                                                                                                                                                                                                                                                                                                                                                                                 |  |                                                                                                                                                                                                                                                                                                          |            |
| 42 |    |                                                                                                                                                                                                                                                                                                                                                                                                                 |  |                                                                                                                                                                                                                                                                                                          |            |
| 43 |    |                                                                                                                                                                                                                                                                                                                                                                                                                 |  |                                                                                                                                                                                                                                                                                                          |            |
| 44 |    |                                                                                                                                                                                                                                                                                                                                                                                                                 |  |                                                                                                                                                                                                                                                                                                          |            |
| 45 |    |                                                                                                                                                                                                                                                                                                                                                                                                                 |  |                                                                                                                                                                                                                                                                                                          |            |
| 46 |    |                                                                                                                                                                                                                                                                                                                                                                                                                 |  |                                                                                                                                                                                                                                                                                                          |            |
| 47 |    |                                                                                                                                                                                                                                                                                                                                                                                                                 |  |                                                                                                                                                                                                                                                                                                          |            |
| 48 |    |                                                                                                                                                                                                                                                                                                                                                                                                                 |  |                                                                                                                                                                                                                                                                                                          |            |
| 49 |    |                                                                                                                                                                                                                                                                                                                                                                                                                 |  |                                                                                                                                                                                                                                                                                                          |            |
| 50 |    |                                                                                                                                                                                                                                                                                                                                                                                                                 |  |                                                                                                                                                                                                                                                                                                          |            |
| 51 |    |                                                                                                                                                                                                                                                                                                                                                                                                                 |  |                                                                                                                                                                                                                                                                                                          |            |
| 52 |    |                                                                                                                                                                                                                                                                                                                                                                                                                 |  |                                                                                                                                                                                                                                                                                                          |            |
| 53 |    |                                                                                                                                                                                                                                                                                                                                                                                                                 |  |                                                                                                                                                                                                                                                                                                          |            |
| 54 |    |                                                                                                                                                                                                                                                                                                                                                                                                                 |  |                                                                                                                                                                                                                                                                                                          |            |
| 55 |    |                                                                                                                                                                                                                                                                                                                                                                                                                 |  |                                                                                                                                                                                                                                                                                                          |            |
| 56 |    |                                                                                                                                                                                                                                                                                                                                                                                                                 |  |                                                                                                                                                                                                                                                                                                          |            |
| 57 |    |                                                                                                                                                                                                                                                                                                                                                                                                                 |  |                                                                                                                                                                                                                                                                                                          |            |
| 58 |    |                                                                                                                                                                                                                                                                                                                                                                                                                 |  |                                                                                                                                                                                                                                                                                                          |            |
| 59 |    |                                                                                                                                                                                                                                                                                                                                                                                                                 |  |                                                                                                                                                                                                                                                                                                          |            |
| 60 |    |                                                                                                                                                                                                                                                                                                                                                                                                                 |  |                                                                                                                                                                                                                                                                                                          |            |

|                    |    |                                                                                                                                                               |  |                                                                                                                                                          |                |
|--------------------|----|---------------------------------------------------------------------------------------------------------------------------------------------------------------|--|----------------------------------------------------------------------------------------------------------------------------------------------------------|----------------|
| 1                  |    | studies, and other relevant evidence                                                                                                                          |  |                                                                                                                                                          |                |
| 2                  |    |                                                                                                                                                               |  |                                                                                                                                                          |                |
| 3                  | 21 | Discuss the generalisability (external validity) of the study results                                                                                         |  |                                                                                                                                                          | Interpretation |
| 4                  |    |                                                                                                                                                               |  |                                                                                                                                                          |                |
| 5                  |    |                                                                                                                                                               |  |                                                                                                                                                          |                |
| <b>Information</b> |    |                                                                                                                                                               |  |                                                                                                                                                          |                |
| 7                  | 22 | Give the source of funding and the role of the funders for the present study and, if applicable, for the original study on which the present article is based |  |                                                                                                                                                          | Title Page     |
| 8                  |    |                                                                                                                                                               |  |                                                                                                                                                          |                |
| 9                  |    |                                                                                                                                                               |  |                                                                                                                                                          |                |
| 10                 |    |                                                                                                                                                               |  |                                                                                                                                                          |                |
| 11                 |    |                                                                                                                                                               |  |                                                                                                                                                          |                |
| 12                 |    |                                                                                                                                                               |  |                                                                                                                                                          |                |
| 13                 |    | ..                                                                                                                                                            |  | RECORD 22.1: Authors should provide information on how to access any supplemental information such as the study protocol, raw data, or programming code. | N/A            |
| 14                 |    |                                                                                                                                                               |  |                                                                                                                                                          |                |
| 15                 |    |                                                                                                                                                               |  |                                                                                                                                                          |                |
| 16                 |    |                                                                                                                                                               |  |                                                                                                                                                          |                |
| 17                 |    |                                                                                                                                                               |  |                                                                                                                                                          |                |
| 18                 |    |                                                                                                                                                               |  |                                                                                                                                                          |                |

19  
 20 Benchimol EI, Smeeth L, Guttman A, Harron K, Moher D, Petersen I, Sørensen HT, von Elm E, Langan SM, the RECORD  
 21 . The REporting of studies Conducted using Observational Routinely-collected health Data (RECORD) Statement. *PLoS Med*  
 22  
 23

24 is protected under Creative Commons Attribution ([CC BY](https://creativecommons.org/licenses/by/4.0/)) license.  
 25

Confidential
